# Supplementary material for: Nickel and nickel oxide nanoparticle-embedded functional carbon nanofibers for lithium sulfur batteries
Source: Royal Society of Chemistry journal article supplement (doi:10.1039/d3na00785e), 2023-12-06
Supplement: d3na00785e1.pdf [file d3na00785e1.pdf]

## Supplementary Data

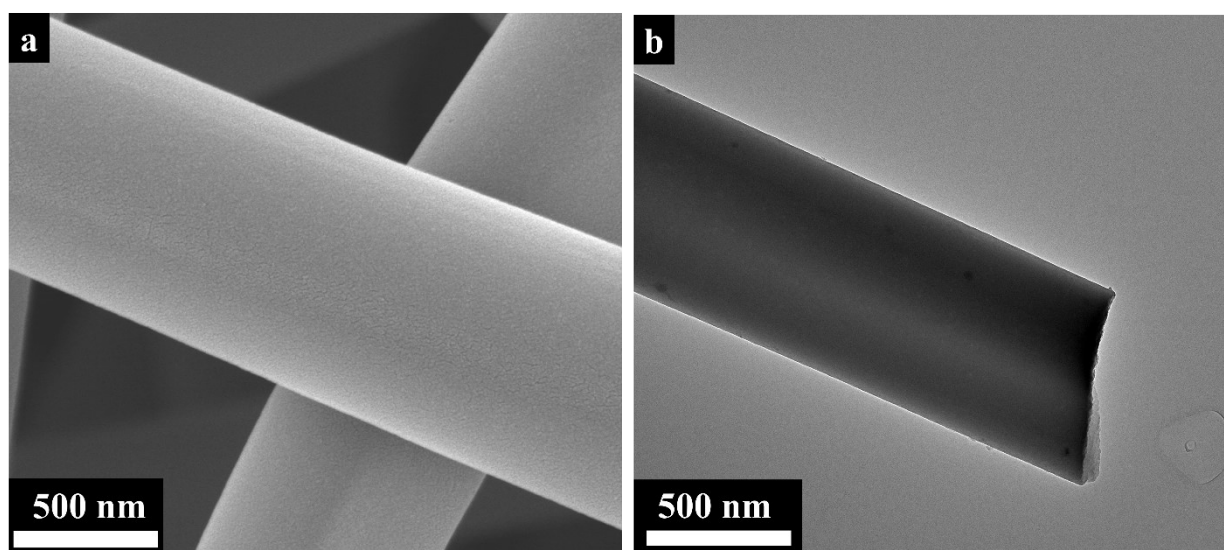

Figure S1. Morphology analysis of CNF: a - Scanning Electron Microscope characterization; b - High-Resolution Transmission Electron Microscope image.

Table S1. BET summary results.

| Composite  | BET Surface Area, m <sup>2</sup> g <sup>-1</sup> | Pore Volume, cm <sup>3</sup> g <sup>-1</sup> | Pore Diameter, nm |
|------------|--------------------------------------------------|----------------------------------------------|-------------------|
| CNF        | 685.219                                          | 0.293                                        | 3.793             |
| Ni/NiO@CNF | 392.756                                          | 0.246                                        | 3.841             |

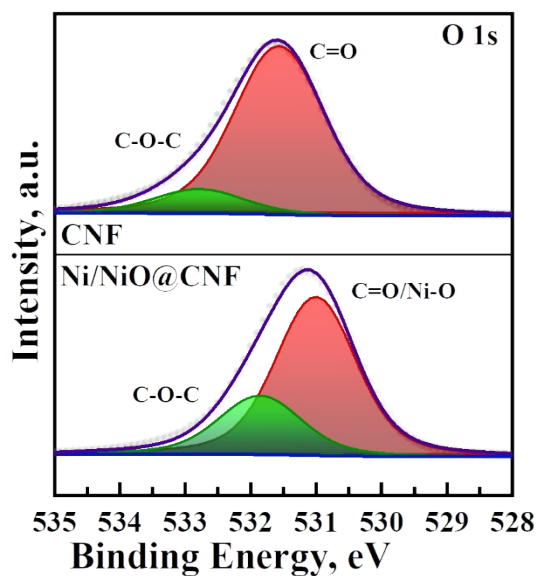

Figure S2. High-resolution O 1s XPS spectra of CNF and Ni/NiO@CNF.
